# Supplementary material
Source: Springer Nature journal article supplement (https://www.springermedizin.de/resource/supplementary/12883_2008_226_MOESM1_ESM.pdf/9457114)

change score on the physical scale proxy

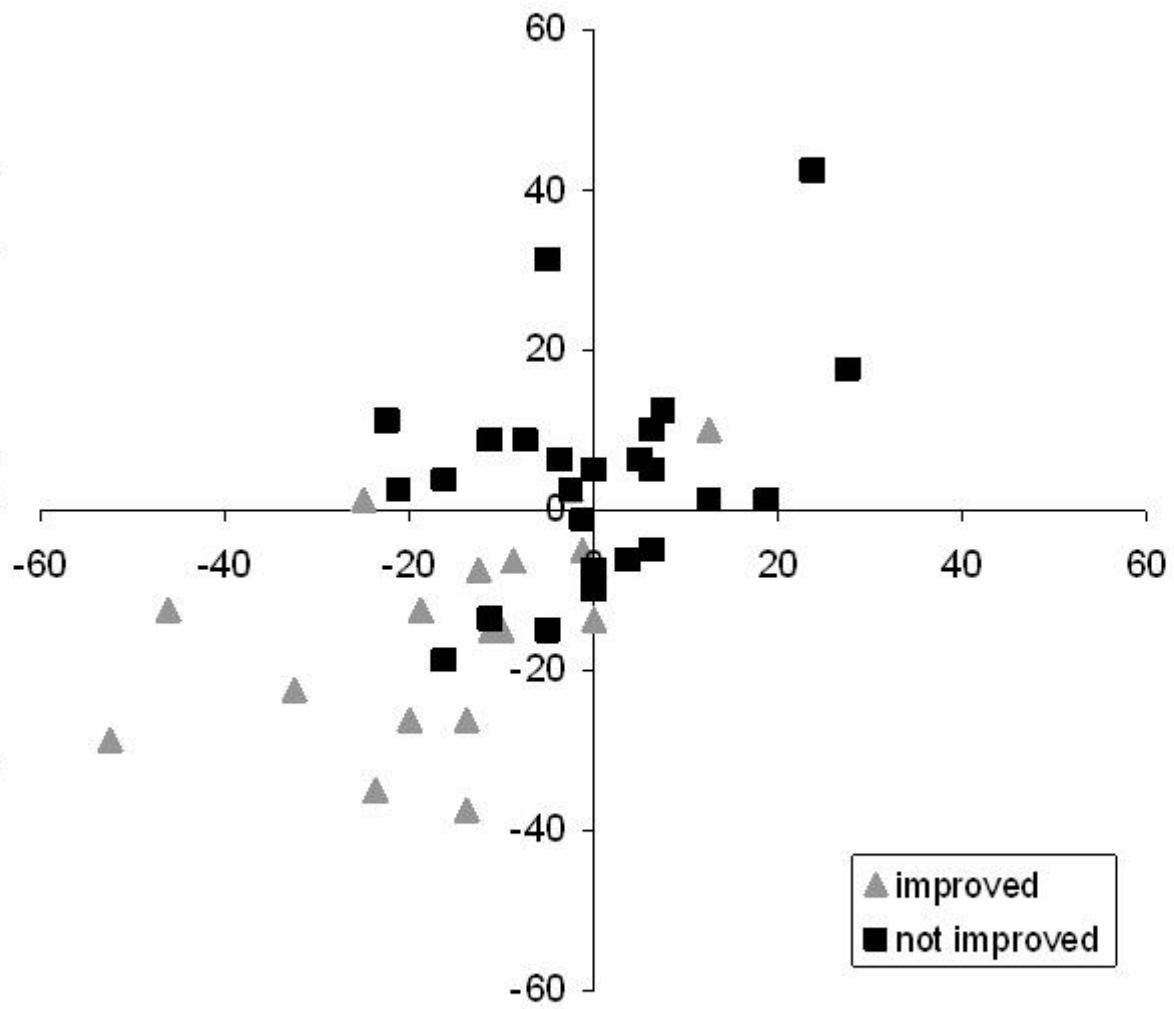

change score on the physical scale patient

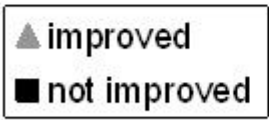

Supplement: MOESM1 [file 9457114]
